# Supplementary material for: Naked-eye and fluorescence detection of basic pH and F−with a 1,8-naphthalimide-based multifunctional probe
Source: Royal Society of Chemistry journal article supplement (doi:10.1039/c5ra00596e), 2015-01-01
Supplement: c5ra00596e1.pdf [file c5ra00596e1.pdf]

## **Naked-eye and fluorescent detection of basic pH and F<sup>-</sup> with a 1,8-naphthalimide-based multifunctional probe**

Weiwei Du, Jie Xu, Haixia Li, Chengcheng Feng, Mingming Yu,\*

Zhanxian Li\* and Liuhe Wei

College of Chemistry and Molecular Engineering, Zhengzhou University, Zhengzhou  
450001, China. E-mail: lizx@zzu.edu.cn; yummm@zzu.edu.cn; Fax/Tel: +86 371  
67781205

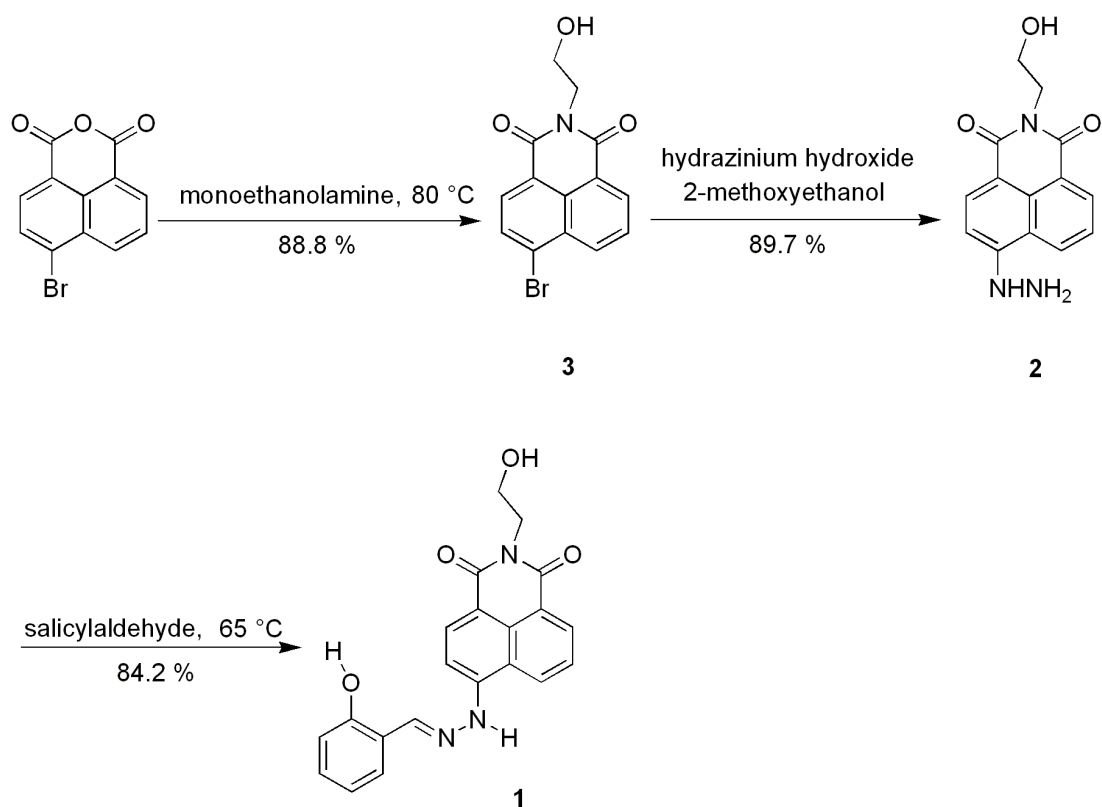

**Scheme S1** Synthetic route of compound 1.

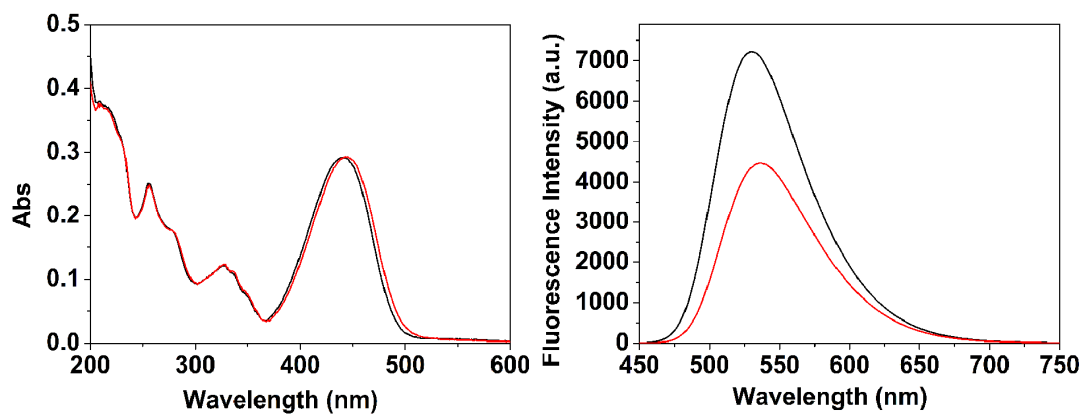

**Fig. S1** Absorption (left) and emission (right) spectra change of probe 1 ( $1.0 \times 10^{-5}$  M, acetonitrile) upon addition of 60  $\mu\text{L}$  water (red line).

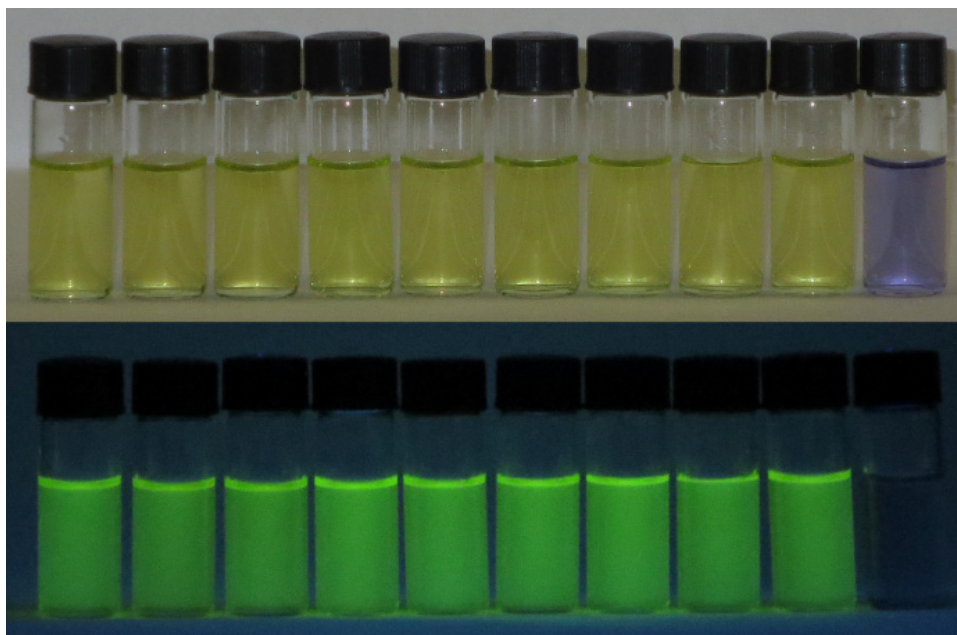

**Fig. S2** Photographs of compound **1** ( $1.0 \times 10^{-5}$  M, acetonitrile) upon addition of different anions (**1** only, tetrabutyl ammonium chloride, t,  $\text{Na}_2\text{SO}_4$ ,  $\text{KNO}_3$ ,  $\text{Na}_2\text{SO}_3$ ,  $\text{NaHSO}_4$ ,  $\text{NaHSO}_3$ , and . from left to right) in aqueous solution in daylight (up) and under a UV lamp (365 nm, down).

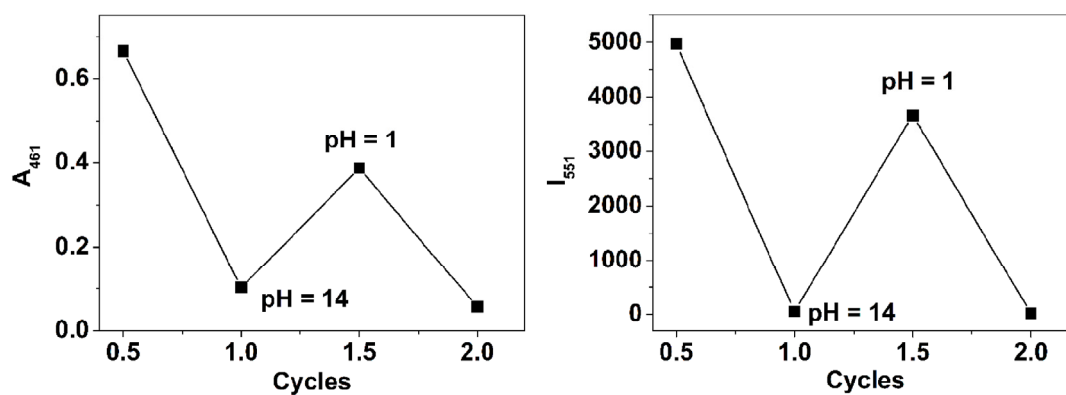

**Fig. S3** pH reversibility study of **1** between pH 3 and 13 with absorption and emission spectra. The excitation wavelength was 460 nm.

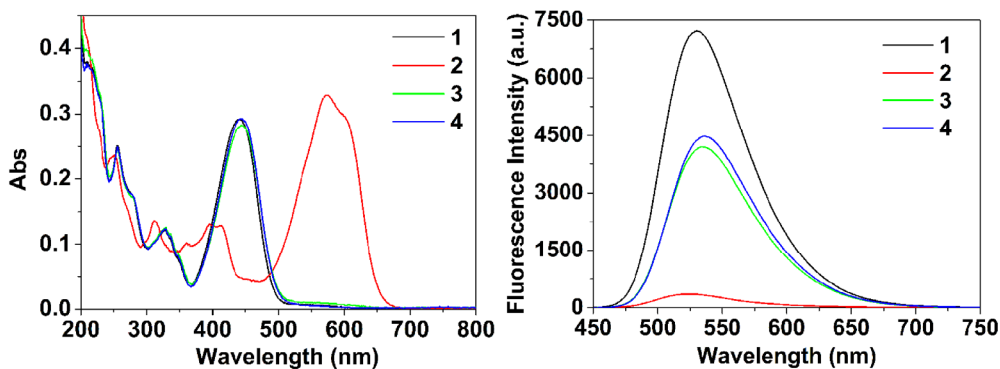

**Fig. S4**  $F^-$  reversibility study of **1** with absorption and emission spectra (Black line, compound **1** in 3 mL  $CH_3CN$ ; red line, compound **1** and 4 equiv  $F^-$  in 3 mL  $CH_3CN$  and 12  $\mu L$  water; green line, compound **1** and 4 equiv  $F^-$  in 3 mL  $CH_3CN$  and 80  $\mu L$  water; blue line, compound **1** in 3 mL  $CH_3CN$  and 72  $\mu L$  water.). The excitation wavelength was 460 nm.

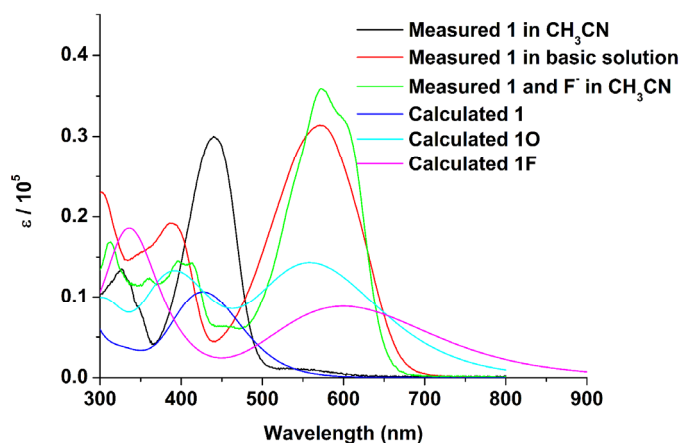

**Fig. S5** Absorption spectrum of probe **1** in different conditions.

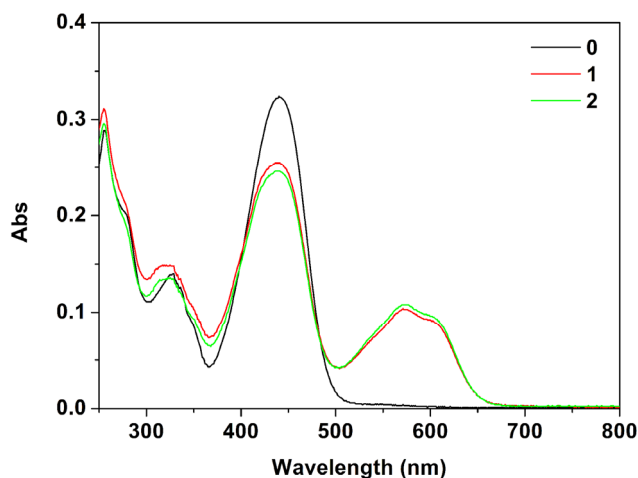

**Fig. S6** Absorption spectra change of probe **1** ( $1.0 \times 10^{-5}$  M, acetonitrile) upon addition of  $F^-$  from toothpaste 1 and 2.

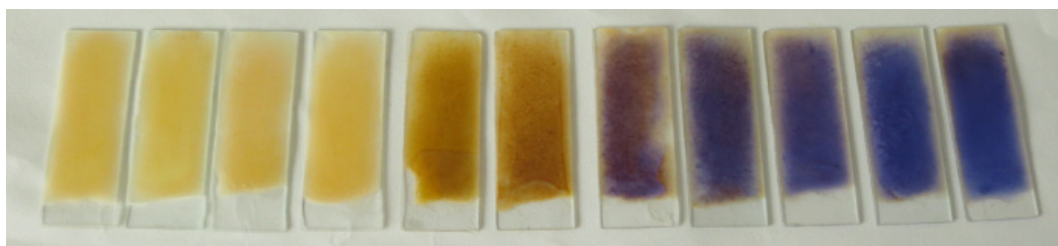

**Fig. S7** Images of chromatography plates for the detection of  $F^-$  at various concentrations (0,  $1.0 \times 10^{-6}$  M,  $1.0 \times 10^{-5}$  M,  $1.0 \times 10^{-4}$  M,  $1.0 \times 10^{-3}$  M,  $5.0 \times 10^{-3}$  M,  $1.0 \times 10^{-2}$  M,  $3.0 \times 10^{-2}$  M,  $5.0 \times 10^{-2}$  M, 0.1 M, 0.2 M, from left to right) in water solutions
